# Supplementary material for: Template-free syntheses of hierarchical PbS microstructures using a new sulphur source and their time-dependent morphological evolution and photocatalytic properties
Source: Royal Society of Chemistry journal article supplement (doi:10.1039/c6ra09110e), 2016-01-01
Supplement: c6ra09110e1.pdf [file c6ra09110e1.pdf]

## Electronic Supplementary Information

### Template-free Syntheses of Hierarchical PbS Microstructures Using a New Sulphur Source and Their Time-dependent Morphological Evolution and Photocatalytic Properties

Manjodh Kaur and C. M. Nagaraja\*

Department of Chemistry, Indian Institute of Technology Ropar, Rupnagar  
140001, Punjab, India. Email: cmnraja@iitrpr.ac.in, Tel:+91-1881242229

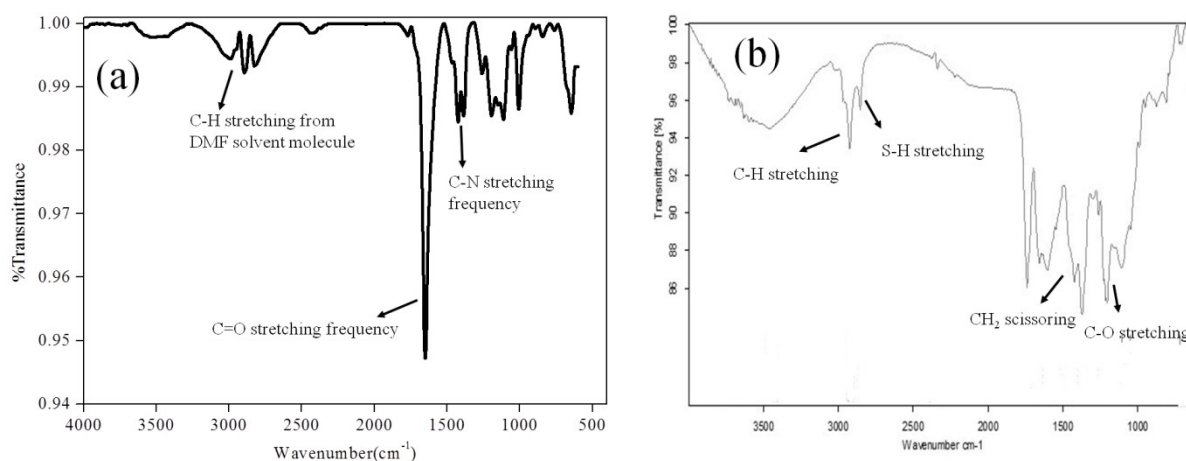

**Fig. S1** IR spectrum of PbS nanostructures (a) S2 (b) S7.

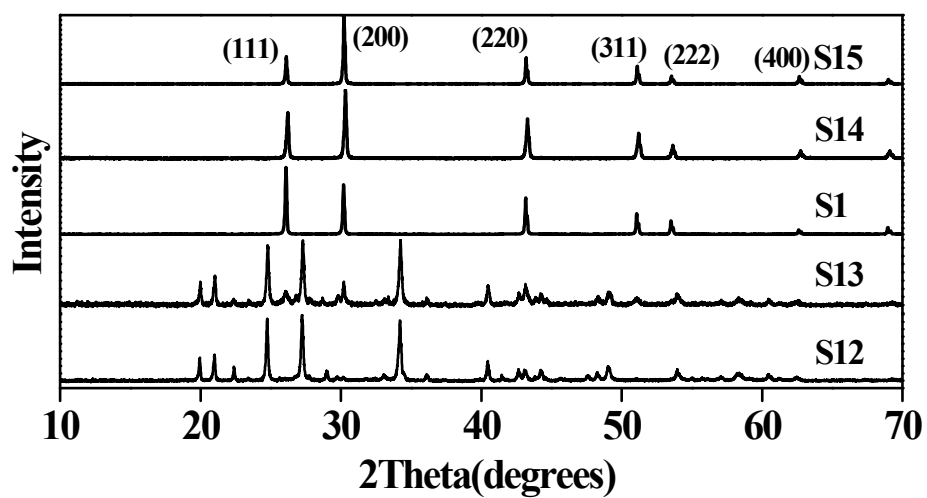

**Fig. S2** XRD pattern of PbS microstructures prepared at different temperatures of 120 °C (S12), 130 °C (S13), 150 °C (S1), 180 °C (S14), 200 °C (S15).

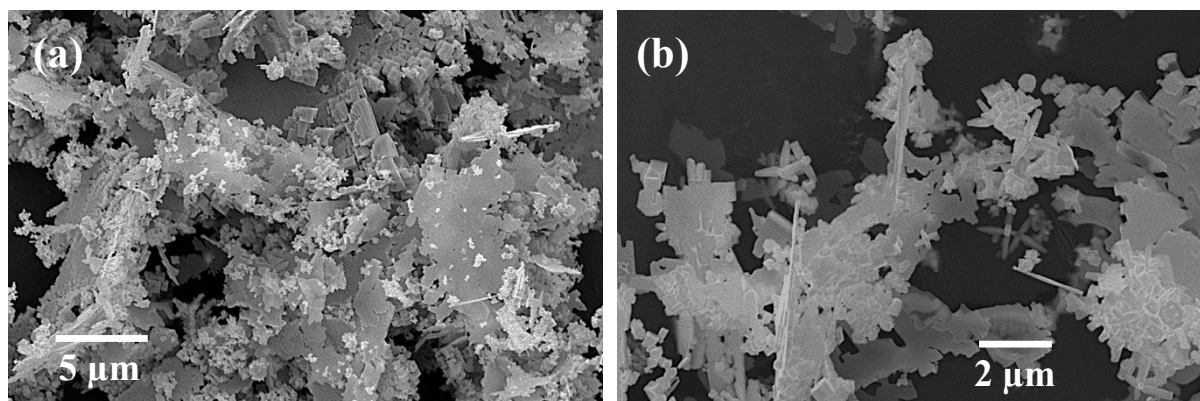

**Fig. S3** SEM images of as-synthesized PbS microstructures (a) 180 °C (S14) (b) 200 °C (S15).

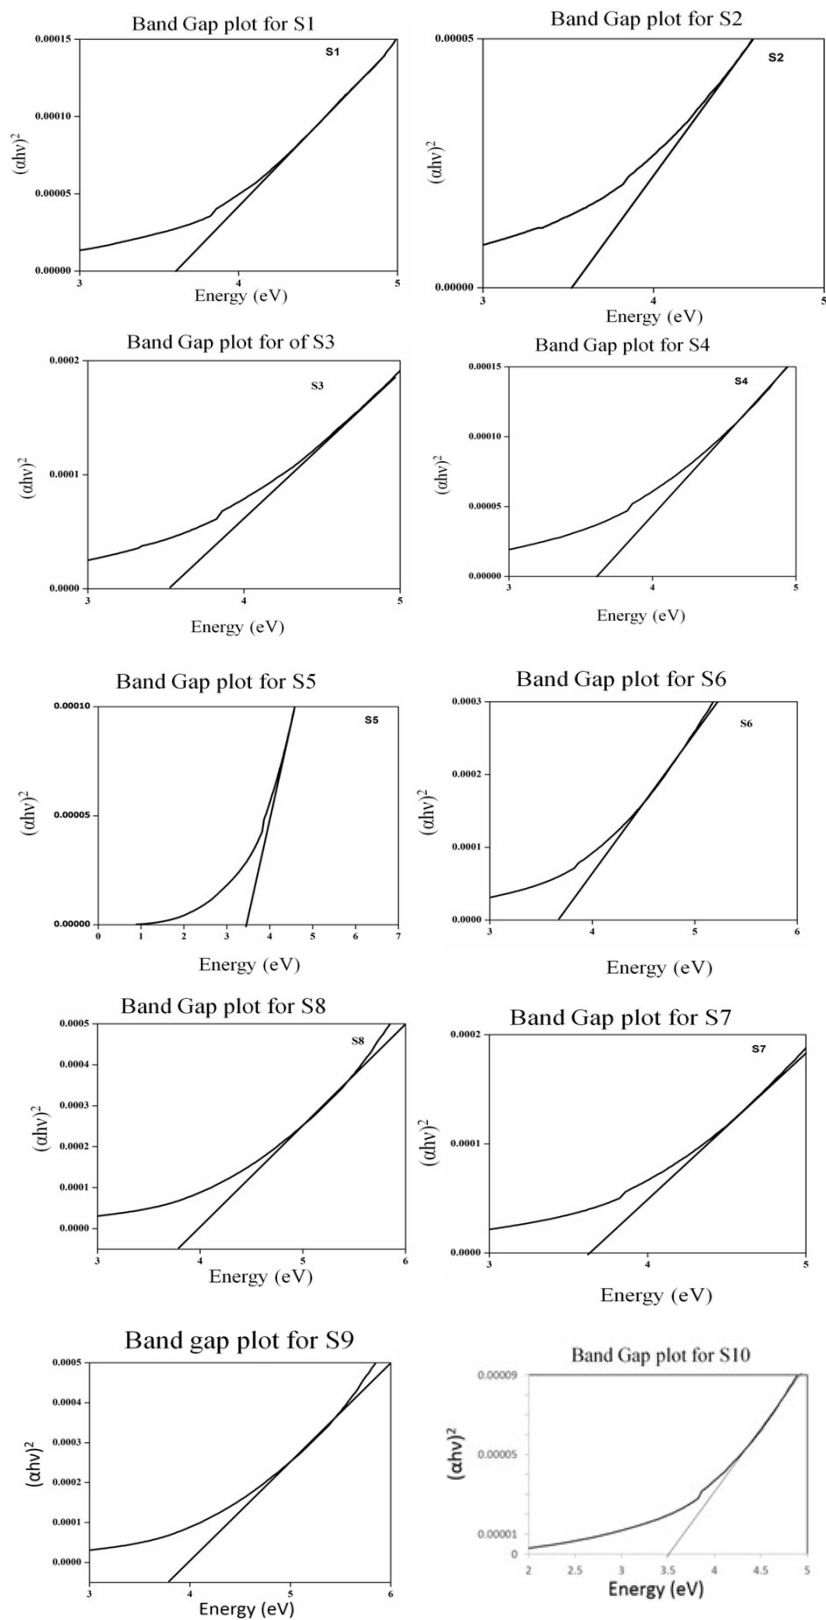

**Fig. S4** Band gap calculations from Tauc plots for PbS (S1-S10)

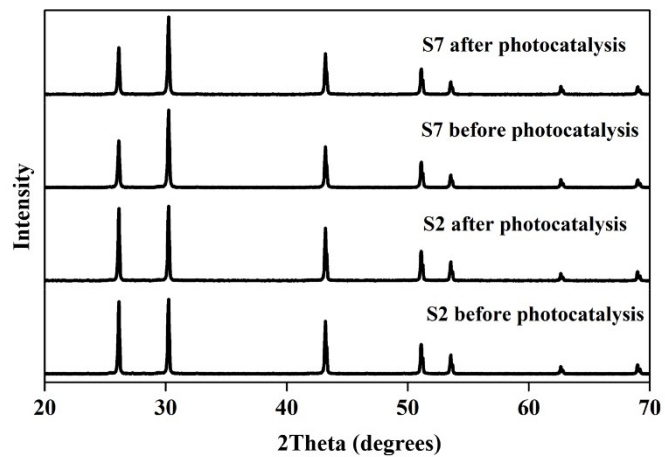

**Fig. S5** PXRd plot of as-synthesized PbS microstructures, **S2** and **S7** before and after the photocatalytic degradation of MO dye.
